# Supplementary material for: Valley splitting of monolayer Hf3C2O2 by the spin–orbit coupling effect: first principles calculations using the HSE06 methods
Source: Royal Society of Chemistry journal article supplement (doi:10.1039/d4cp04003a), 2024-11-29
Supplement: d4cp04003a1.pdf [file d4cp04003a1.pdf]

**Valley splitting of monolayer  $\text{Hf}_3\text{C}_2\text{O}_2$  by spin-orbit coupling effect:**

**First principle calculation using the *HSE06* methods**

Shiqian Qiao,\* Yang Zhang,\* Shasha Li, Lujun Wei, Hong Wu, Feng Li†

School of Science & New Energy Technology Engineering Laboratory of Jiangsu  
Province, Nanjing University of Posts and Telecommunications (NJUPT), Nanjing  
210046, China

Shiqian Qiao and Yang Zhang contributed equally to this manuscript.

**Corresponding Authors:**

lifeng@njupt.edu.cn;

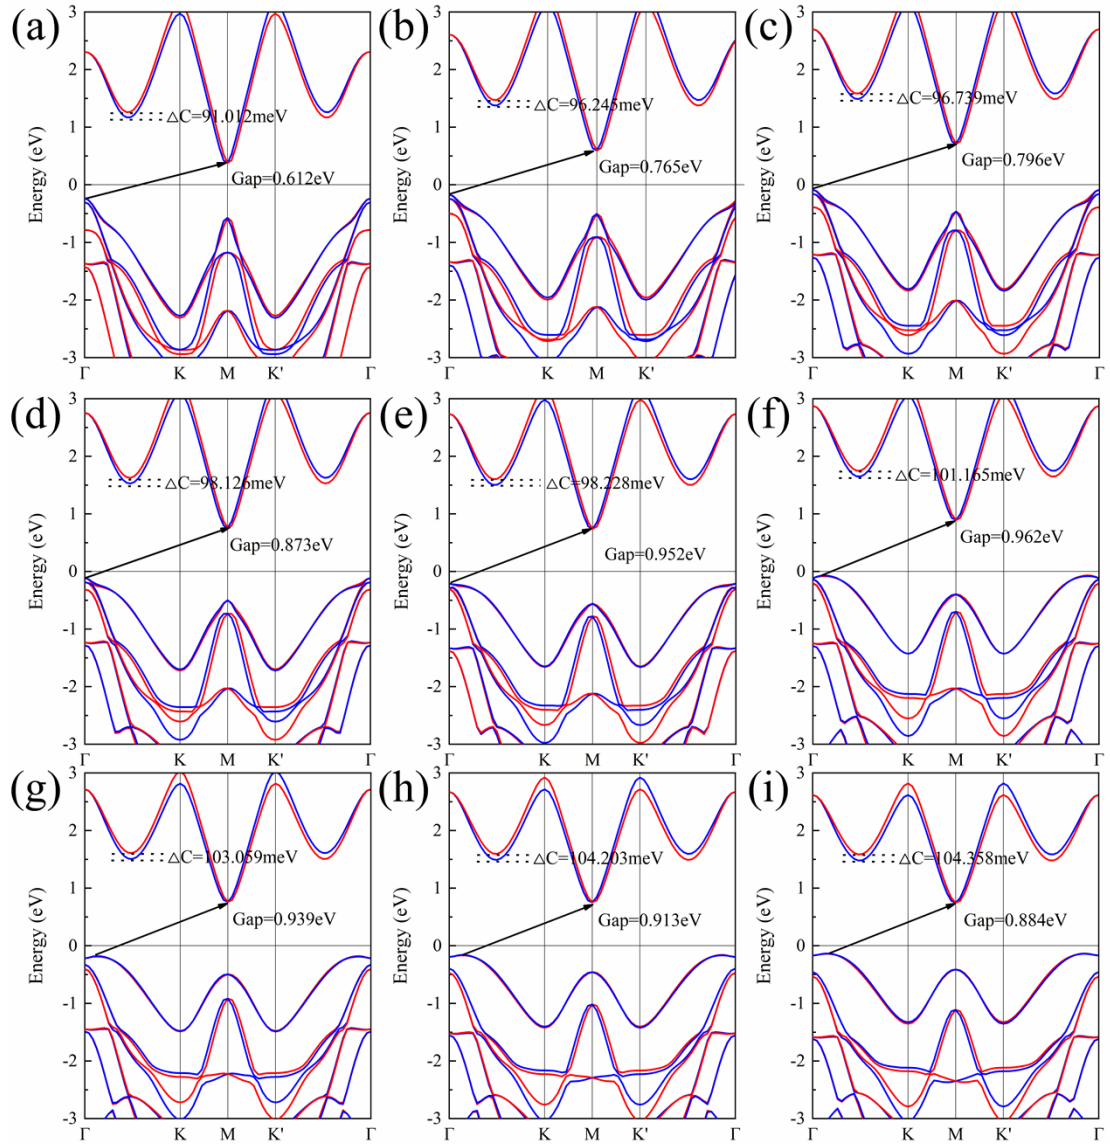

Figure S1. (a)~(i) The band structure of  $1L$   $\text{Hf}_3\text{C}_2\text{O}_2$  under biaxial strain from -4% to 4%.

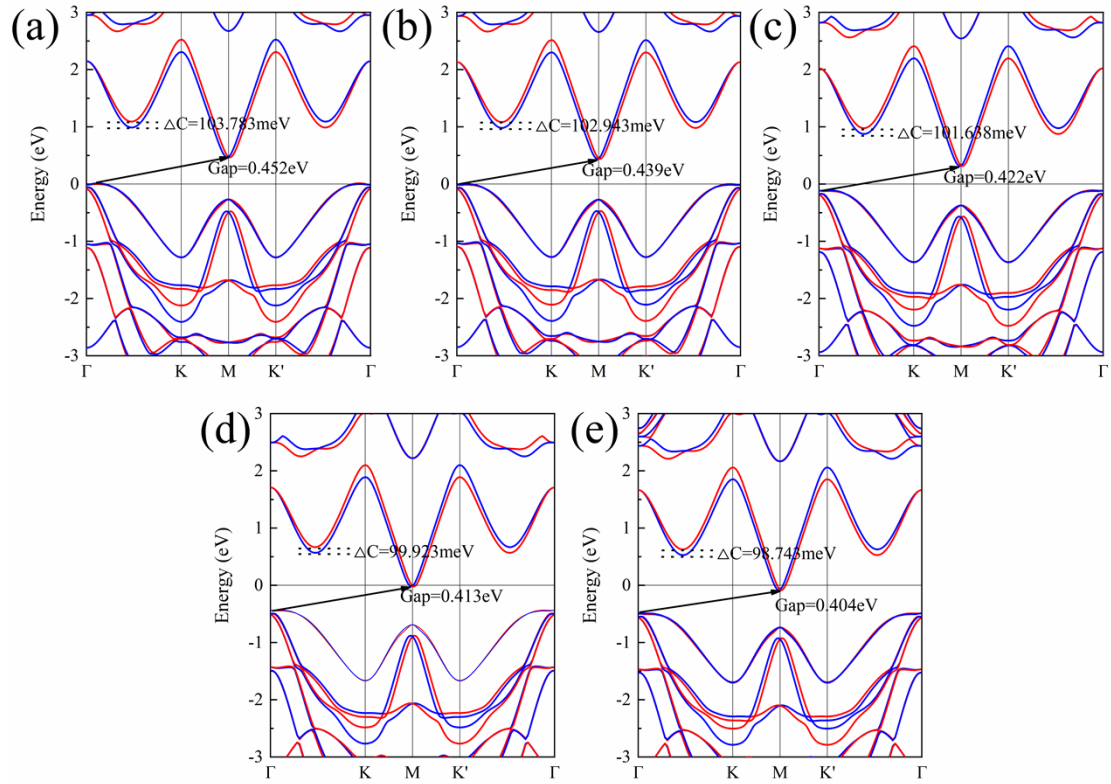

Figure S2. (a)~(e) The band structure of  $IL\text{Hf}_3\text{C}_2\text{O}_2$  at doping concentrations ranging from -0.1 electron/unit cell to 0.1 electron/unit cell. (The interval is 0.05 electron/unit cell)
